# Supplementary material for: Synergistic effect of potential alpha-amylase inhibitors from Egyptian propolis with acarbose using in silico and in vitro combination analysis
Source: BMC Complement Med Ther. 2024 Jan 30;24:65. doi: 10.1186/s12906-024-04348-x (PMC10826043; doi:10.1186/s12906-024-04348-x)
Supplement: Supplementary file 1 — Additional file 1. [file 12906_2024_4348_MOESM1_ESM.zip]

Archive with 2 entries (2 files):
- 01-06-24 Sheet S1.xlsx
- 01-06-24 Supplementary Materials BMC.docx
