# Supplementary material for: Synergistic effect of potential alpha-amylase inhibitors from Egyptian propolis with acarbose using in silico and in vitro combination analysis
Source: BMC Complement Med Ther. 2024 Jan 30;24:65. doi: 10.1186/s12906-024-04348-x (PMC10826043; doi:10.1186/s12906-024-04348-x)
Supplement: Supplementary file 1 — Additional file 1. [file 12906_2024_4348_MOESM1_ESM.zip › 01-06-24 Sheet S1.xlsx]

## Sheet: Sheet S1
#	Compound	PubChem Link	PubChem CID	Molecular Formula	MWT	SMILES
1	1,4-Dihydroxybenzene	https://pubchem.ncbi.nlm.nih.gov/compound/785	785	C6H6O2	110.11	C1=CC(=CC=C1O)O
2	[1-(5-ethenyltetrahydro-5-methyl-2-furanyl)-1-methylethanol], cis	https://pubchem.ncbi.nlm.nih.gov/compound/11116492	11116492	C10H18O2	170.25	CC([C@H]1O[C@@](C)(C=C)CC1)(O)C
3	1-(2,4-dihydroxy-6-methoxyphenyl)-3-phenylprop-2-en-1-one	https://pubchem.ncbi.nlm.nih.gov/compound/154102	154102	C16H14O4	270.28	COC1=CC(=CC(=C1C(=O)C=CC2=CC=CC=C2)O)O
4	1-(2,4-Dimethylphenyl)-2-phenylethane	https://pubchem.ncbi.nlm.nih.gov/compound/54463707	54463707	C16H16	208.3	CC1=CC=C(C=CC2=CC=CC=C2)C(C)=C1
5	1-(Dihydroxyphenyl)-3-phenylpropenone	https://pubchem.ncbi.nlm.nih.gov/compound/101418137	101418137	C15H12O3	240.25	OC1=CC=CC(O[H])=C1/C([H])=C([H])/C(C2=C([H])C([H])=C([H])C([H])=C2[H])=O
6	1,1,1-Tris(hydroxymethyl)propane	https://pubchem.ncbi.nlm.nih.gov/compound/6510	6510	C6H14O3	134.17	CCC(CO)(CO)CO
7	1,1,4,7-tetramethyldecahydro-1H-cyclopropa[e]azulen-4-ol	https://pubchem.ncbi.nlm.nih.gov/compound/101716	101716	C15H26O	222.37	CC1CCC2C1C3C(C3(C)C)CCC2(C)O
8	1,2,3-Propanetriol triacetate (Triacetin)	https://pubchem.ncbi.nlm.nih.gov/compound/5541	5541	C9H14O6	218.2	CC(=O)OCC(COC(=O)C)OC(=O)C
9	1,2,3-Trihydroxybutanal	https://pubchem.ncbi.nlm.nih.gov/compound/250402	250402	C4H8O4	120.1	CC(C(C(=O)O)O)O
10	1,2,4-trihydroxybutane	https://pubchem.ncbi.nlm.nih.gov/compound/18302	18302	C4H10O3	106.12	C(CO)C(CO)O
11	1,2,4-Trihydroxynaphthalene	https://pubchem.ncbi.nlm.nih.gov/compound/83323	83323	C10H8O3	176.17	C1=CC=C2C(=C1)C(=CC(=C2O)O)O
12	1,2-Benzenedicarboxylic acid	https://pubchem.ncbi.nlm.nih.gov/compound/1017	1017	C8H6O4	166.13	C1=CC=C(C(=C1)C(=O)O)C(=O)O
13	1,2-Benzenedicarboxylicacid, bis(2methylpropyl)ester	https://pubchem.ncbi.nlm.nih.gov/compound/6782	6782	C16H22O4	278.34	CC(C)COC(=O)C1=CC=CC=C1C(=O)OCC(C)C
14	1,2-dihydroxycyclohexene	https://pubchem.ncbi.nlm.nih.gov/compound/15642161	15642161	C6H10O2	114.14	OC1=C(O)CCCC1
15	1,3-Bis[2hydroxyphenyl]-2-propen-1-one	https://pubchem.ncbi.nlm.nih.gov/compound/638277	638277	C15H12O3	240.25	C1=CC=C(C(=C1)C=CC(=O)C2=CC=CC=C2O)O
16	1,3-dihydroxy-5-heptadecylbenzene	https://pubchem.ncbi.nlm.nih.gov/compound/181700	181700	C23H40O2	348.6	CCCCCCCCCCCCCCCCCC1=CC(=CC(=C1)O)O
17	1,4-dimethyl-7-propan-2-ylidene-2,3,4,5,6,8-hexahydro-1H-azulene	https://pubchem.ncbi.nlm.nih.gov/compound/6949	6949	C15H24	204.35	CC1CCC(=C(C)C)CC2=C1CCC2C
18	1,4-Naphthalenedione 2,3,5 ,8-tetrahydroxy-6,7-dimethoxy	https://pubchem.ncbi.nlm.nih.gov/compound/135782713	135782713	C12H10O8	282.2	COC1=C(C(=O)C2=C(C1=O)C(=C(C(=C2O)O)O)O)OC
19	1,7-Dihydroxy-3-methoxy-6-methylanthraquinone	https://pubchem.ncbi.nlm.nih.gov/compound/159926	159926	C16H12O5	284.26	CC1=CC2=C(C=C1O)C(=O)C3=C(C2=O)C=C(C=C3O)OC
20	1,8-dihydroxy-3-methylanthraquinone	https://pubchem.ncbi.nlm.nih.gov/compound/10208	10208	C15H10O4	254.24	CC1=CC2=C(C(=C1)O)C(=O)C3=C(C2=O)C=CC=C3O
21	13-Octadecenoic acid, (E)-	https://pubchem.ncbi.nlm.nih.gov/compound/6161490	6161490	C18H34O2	282.5	CCCCC=CCCCCCCCCCCCC(=O)O
22	1-butyl-2-methyl-7-methoxy-5h,6h-pyrido[3,4-b]indol	https://pubchem.ncbi.nlm.nih.gov/compound/138373847	138373847	C17H22N2O	270.37	CCCCC1=C2C(=C3CCC(=CC3=N2)OC)C=CN1C
23	1h-Imidazole-4-carboxamide, 5-amino-	https://pubchem.ncbi.nlm.nih.gov/compound/9679	9679	C4H6N4O	126.12	C1=NC(=C(N1)C(=O)N)N
24	1H-purine-2,6-dione, 3,7-dihydro-3,7-dimethyl-	https://pubchem.ncbi.nlm.nih.gov/compound/5429	5429	C7H8N4O2	180.16	CN1C=NC2=C1C(=O)NC(=O)N2C
25	1h-Pyrrole, 5-(3-methoxyphenyl)-2,3-diphenyl	https://pubchem.ncbi.nlm.nih.gov/compound/14616731	14616731	C23H19NO	325.4	COC1=CC=CC(=C1)C2=CC(=C(N2)C3=CC=CC=C3)C4=CC=CC=C4
26	1-Methoxy-1,3-dihydroxypropane	https://pubchem.ncbi.nlm.nih.gov/compound/22999750	22999750	C4H10O3	106.12	COC(CCO)O
27	1-O-Octadecylglycerol	https://pubchem.ncbi.nlm.nih.gov/compound/3681	3681	C21H44O3	344.6	CCCCCCCCCCCCCCCCCCOCC(CO)O
28	2(3H)-Furanone-5-butyldihydroxy	https://pubchem.ncbi.nlm.nih.gov/compound/7704	7704	C8H14O2	142.2	CCCCC1CCC(=O)O1
29	2(3H)-Furanone-5-heptyldihydroxy	https://pubchem.ncbi.nlm.nih.gov/compound/7714	7714	C11H20O2	184.27	CCCCCCCC1CCC(=O)O1
30	2(3H)-Furanone-5-hexyldihydroxy	https://pubchem.ncbi.nlm.nih.gov/compound/12813	12813	C10H18O2	170.25	CCCCCCC1CCC(=O)O1
31	2,3-dihydroxypentanedioic acid	https://pubchem.ncbi.nlm.nih.gov/compound/9905181	9905181	C5H8O6	164.11	C(C(C(C(=O)O)O)O)C(=O)O
32	2,3,4-Trihydroxybenzoic acid	https://pubchem.ncbi.nlm.nih.gov/compound/11874	11874	C7H6O5	170.12	C1=CC(=C(C(=C1C(=O)O)O)O)O
33	2,3,4-Trihydroxybutyric acid	https://pubchem.ncbi.nlm.nih.gov/compound/439535	439535	C4H8O5	136.1	C(C(C(C(=O)O)O)O)O
34	2,3-Butanediol	https://pubchem.ncbi.nlm.nih.gov/compound/262	262	C4H10O2	90.12	CC(C(C)O)O
35	2,3-Dihydroxypropanoic acid	https://pubchem.ncbi.nlm.nih.gov/compound/752	752	C3H6O4	106.08	C(C(C(=O)O)O)O
36	2,4,6-Tri(dimethylbenzyl)phenol	https://pubchem.ncbi.nlm.nih.gov/compound/634812	634812	C33H36O	448.6	CC(C)(C1=CC=CC=C1)C2=CC(=C(C(=C2)C(C)(C)C3=CC=CC=C3)O)C(C)(C)C4=CC=CC=C4
37	2,4,6-Trihydroxybenzoic acid	https://pubchem.ncbi.nlm.nih.gov/compound/66520	66520	C7H6O5	170.12	C1=C(C=C(C(=C1O)C(=O)O)O)O
38	2,4,6-triphenyl-1,3-dioxane	https://pubchem.ncbi.nlm.nih.gov/compound/568919	568919	C22H20O2	316.4	C1C(OC(OC1C2=CC=CC=C2)C3=CC=CC=C3)C4=CC=CC=C4
39	2,4-bis(Dimethylbenzyl)-6-t-butylphenol	https://pubchem.ncbi.nlm.nih.gov/compound/632910	632910	C28H34O	386.6	CC(C)(C)C1=C(C(=CC(=C1)C(C)(C)C2=CC=CC=C2)C(C)(C)C3=CC=CC=C3)O
40	2,4-Dihydroxybenzoic acid	https://pubchem.ncbi.nlm.nih.gov/compound/1491	1491	C7H6O4	154.12	C1=CC(=C(C=C1O)O)C(=O)O
41	2,5-Dihydroxyphenol	https://pubchem.ncbi.nlm.nih.gov/compound/10787	10787	C6H6O3	126.11	C1=CC(=C(C=C1O)O)O
42	2,6-bis-(Pentanyloxy)-4-pentanylphenethanol	https://pubchem.ncbi.nlm.nih.gov/compound/91396601	91396601	C23H40O3	364.57	OCCC1=C(OCCCCC)C=C(CCCCC)C=C1OCCCCC
43	2,6-bis(t-Butyl)-4-(dimethylbenzyl)phenol	https://pubchem.ncbi.nlm.nih.gov/compound/161829	161829	C23H32O	324.5	CC(C)(C)C1=CC(=CC(=C1O)C(C)(C)C)C(C)(C)C2=CC=CC=C2
44	2,6-Dihydroxybenzoic acid	https://pubchem.ncbi.nlm.nih.gov/compound/9338	9338	C7H6O4	154.12	C1=CC(=C(C(=C1)O)C(=O)O)O
45	2,6-Di-tert-butyl-4-methoxyphenol	https://pubchem.ncbi.nlm.nih.gov/compound/10269	10269	C15H24O2	236.35	CC(C)(C)C1=CC(=CC(=C1O)C(C)(C)C)OC
46	2-amino-3-hydroxyl Benzoic acid, methyl ester	https://pubchem.ncbi.nlm.nih.gov/compound/205248	205248	C8H9NO3	167.16	COC(=O)C1=C(C(=CC=C1)O)N
47	2-Amino-3-methoxybenzoic acid	https://pubchem.ncbi.nlm.nih.gov/compound/255720	255720	C8H9NO3	167.16	COC1=CC=CC(=C1N)C(=O)O
48	2-butenedioic acid (E)	https://pubchem.ncbi.nlm.nih.gov/compound/444972	444972	C4H4O4	116.07	C(=CC(=O)O)C(=O)O
49	2'-Hydroxy-2,4,5-trimethoxychalcone	https://pubchem.ncbi.nlm.nih.gov/compound/11522525	11522525	C18H18O5	314.3	COC1=CC(=C(C=C1C=CC(=O)C2=CC=CC=C2O)OC)OC
50	2-Ethyl-1,3-dihydroxypropane	https://pubchem.ncbi.nlm.nih.gov/compound/102293	102293	C5H12O2	104.15	CCC(CO)CO
51	2-Hydroxy-3-methoxybenzyl alcohol	https://pubchem.ncbi.nlm.nih.gov/compound/78088	78088	C8H10O3	154.16	COC1=CC=CC(=C1O)CO
52	2-hydroxy-cyclohexane-1-carboxylic acid	https://pubchem.ncbi.nlm.nih.gov/compound/271816	271816	C7H12O3	144.17	C1CCC(C(C1)C(=O)O)O
53	2-Hydroxyhexacosanoic acid	https://pubchem.ncbi.nlm.nih.gov/compound/85692	85692	C26H52O3	412.7	CCCCCCCCCCCCCCCCCCCCCCCCC(C(=O)O)O
54	2-Hydroxypropanoic acid	https://pubchem.ncbi.nlm.nih.gov/compound/612	612	C3H6O3	90.08	CC(C(=O)O)O
55	2-Ketogluconic acid	https://pubchem.ncbi.nlm.nih.gov/compound/3035456	3035456	C6H10O7	194.14	C(C(C(C(C(=O)C(=O)O)O)O)O)O
56	2-Methoxy-4-vinylphenol	https://pubchem.ncbi.nlm.nih.gov/compound/332	332	C9H10O2	150.17	COC1=C(C=CC(=C1)C=C)O
57	2-Methyl-1,6-hydroxyanthra-9,10-quinone	https://pubchem.ncbi.nlm.nih.gov/compound/124063	124063	C15H10O4	254.24	CC1=C(C2=C(C=C1)C(=O)C3=C(C2=O)C=CC(=C3)O)O
58	2-Methyl-2-butenyl caffeate	https://pubchem.ncbi.nlm.nih.gov/compound/92015261	92015261	C14H16O4	248.27	CC=C(C)COC(=O)C=CC1=CC(=C(C=C1)O)O
59	2-Methyl-2-butenyl trans caffeate	https://pubchem.ncbi.nlm.nih.gov/compound/92015261	92015261	C14H16O4	248.27	OC1=CC(/C=C/C(OCC(C)=CC)=O)=CC=C1O
60	2-Methyl-2-butenyl-cis-ferulate	-	-	C15H18O4	262.31	COC1=CC(/C=C\C(OCC(C)=CC)=O)=CC=C1O
61	2-Methyl-2-butenyl-trans-coumarate	-	-	C14H16O3	232.28	OC1=CC=C(C=C1)/C=C/C(OCC(C)=CC)=O
62	2-Methyl-2-butenyl-trans-ferulate	-	-	C15H18O4	262.31	COC1=CC(/C=C/C(OCC(C)=CC)=O)=CC=C1O
63	2-Methylbutyl trans caffeate	-	-	C14H18O4	250.29	OC1=CC(/C=C/C(OCC(C)CC)=O)=CC=C1O
64	2-naphthalenemethanol,1,2,3,4,4a,5,6,7-octahydro-alpha,alpha,4a,8-tetramethyl-, (2R-cis)-	https://pubchem.ncbi.nlm.nih.gov/compound/6432005	6432005	C15H26O	222.37	CC1=C2CC(CCC2(CCC1)C)C(C)(C)O
65	2-O-Glycerylgalactose	-	-	C9H18O8	254.24	O=C[C@@H]([C@H]([C@H]([C@@H](CO)O)O)O)OCC(CO)O
66	2-Palmitoylglycerol	https://pubchem.ncbi.nlm.nih.gov/compound/123409	123409	C19H38O4	330.5	CCCCCCCCCCCCCCCC(=O)OC(CO)CO
67	2-propenoic acid-3-methoxy-3-hydroxy methyl ester	https://pubchem.ncbi.nlm.nih.gov/compound/610944	610944	C5H8O4	132.11	COC(=CC(=O)OC)O
68	3- methyl-3-hydroxy Pentanedioic acid	https://pubchem.ncbi.nlm.nih.gov/compound/1662	1662	C6H10O5	162.14	CC(CC(=O)O)(CC(=O)O)O
69	3-(2,4-dihydroxyphenyl)-1-(4-hydroxyphenyl)prop-2-en-1-one	https://pubchem.ncbi.nlm.nih.gov/compound/5057077	5057077	C15H12O4	256.25	C1=CC(=CC=C1C(=O)C=CC2=C(C=C(C=C2)O)O)O
70	3-(Hydroxymethyl)-1-phenyl-1-heptadecyn-3-ol	https://pubchem.ncbi.nlm.nih.gov/compound/123698056	123698056	C24H38O2	358.6	CCCCCCCCCCCCCCC(CO)(C#CC1=CC=CC=C1)O
71	3,11,17,20 tetrahydroxypregn-5-ene	-	-	C21H34O4	350.5	C[C@H](O)[C@@]1(O)CC[C@@]2([H])[C@]3([H])CC=C4C[C@H](O)CC[C@]4(C)[C@@]3([H])[C@H](O)C[C@]12C
72	3,2',4',5'-Tetramethoxyflavone	https://pubchem.ncbi.nlm.nih.gov/compound/45933947	45933947	C19H18O6	342.3	COC1=CC(=C(C=C1C2=C(C(=O)C3=CC=CC=C3O2)OC)OC)OC
73	3,3',7,8-Tetramethoxyflavone	https://pubchem.ncbi.nlm.nih.gov/compound/24721394	24721394	C19H18O6	342.3	COC1=C(C2=C(C=C1)C(=O)C(=C(O2)C3=CC(=CC=C3)OC)OC)OC
74	3,4,5-Trihydroxybenzoic acid	https://pubchem.ncbi.nlm.nih.gov/compound/370	370	C7H6O5	170.12	C1=C(C=C(C(=C1O)O)O)C(=O)O
75	3,4,5-Trimethoxycinnamic acid	https://pubchem.ncbi.nlm.nih.gov/compound/735755	735755	C12H14O5	238.24	COC1=CC(=CC(=C1OC)OC)C=CC(=O)O
76	3,4-Dimethoxybenzoic acid	https://pubchem.ncbi.nlm.nih.gov/compound/7121	7121	C9H10O4	182.17	COC1=C(C=C(C=C1)C(=O)O)OC
77	3,4-Dimethoxy-cis-cinnamic acid	https://pubchem.ncbi.nlm.nih.gov/compound/1585026	1585026	C11H12O4	208.21	COC1=C(C=C(C=C1)/C=C\C(=O)O)OC
78	3,4-Dimethoxy-trans-cinnamic acid	https://pubchem.ncbi.nlm.nih.gov/compound/717531	717531	C11H12O4	208.21	COC1=C(C=C(C=C1)/C=C/C(=O)O)OC
79	3,5,3',5'-Tetra-tert-butyldiphenoquinone	https://pubchem.ncbi.nlm.nih.gov/compound/225283	225283	C28H40O2	408.6	CC(C)(C)C1=CC(=C2C=C(C(=O)C(=C2)C(C)(C)C)C(C)(C)C)C=C(C1=O)C(C)(C)C
80	3,5-diisopropoxy-nonanyl coumarate	-	-	C24H38O5	406.56	OC1=CC=C(C=C1)/C=C/C(OCCC(OC(C)C)CC(OC(C)C)CCCC)=O
81	3,5-dimethoxy-4-pentanyl cinnamic acid	-	-	C16H22O4	278.35	O=C(O)C=CC1=CC(OC)=C(CCCCC)C(OC)=C1
82	3,5-diprenyl coumaric acid	-	-	C19H24O3	300.4	OC1=C(C/C=C(C)\C)C=C(C=C1C/C=C(C)\C)/C=C/C(O)=O
83	3,5-diprenyldihydrocoumaric acid	https://pubchem.ncbi.nlm.nih.gov/compound/5316551	5316551	C19H26O3	302.41	OC1=C(C/C=C(C)\C)C=C(C=C1C/C=C(C)\C)CCC(O)=O
84	3,7,2',4',5'-Pentamethoxyflavone	https://pubchem.ncbi.nlm.nih.gov/compound/45933946	45933946	C20H20O7	372.4	COC1=CC2=C(C=C1)C(=O)C(=C(O2)C3=CC(=C(C=C3OC)OC)OC)OC
85	3alpha-Cycloartenol-26-oic acid	https://pubchem.ncbi.nlm.nih.gov/compound/162956741	162956741	C30H48O3	456.71	CC1(C)[C@H](O)CC[C@]2(C3)[C@]43CC[C@]5(C)[C@@H]([C@H](C)CCC=C(C)C(O)=O)CC[C@](C)5[C@]4([H])CC[C@@]12[H]
86	3beta-Cycloartenol-26-oic acid	https://pubchem.ncbi.nlm.nih.gov/compound/162956739	162956739	C30H48O3	456.71	CC1(C)[C@@H](O)CC[C@]2(C3)[C@]43CC[C@]5(C)[C@@H]([C@H](C)CCC=C(C)C(O)=O)CC[C@](C)5[C@]4([H])CC[C@@]12[H]
87	3-Hexanyl-octyldihydroferulate	-	-	C24H40O4	392.58	COC1=CC(CCC(OCCC(CCCCCC)CCCCC)=O)=CC=C1O
88	3-hydroxy-2-oxopropanoic acid	https://pubchem.ncbi.nlm.nih.gov/compound/964	964	C3H4O4	104.06	C(C(=O)C(=O)O)O
89	3-Hydroxy-6,2',4'-trimethoxyflavone	https://pubchem.ncbi.nlm.nih.gov/compound/688731	688731	C18H16O6	328.3	COC1=CC2=C(C=C1)OC(=C(C2=O)O)C3=C(C=C(C=C3)OC)OC
90	3-Hydroxydecanoic acid	https://pubchem.ncbi.nlm.nih.gov/compound/26612	26612	C10H20O3	188.26	CCCCCCCC(CC(=O)O)O
91	3-Hydroxypropanoic acid	https://pubchem.ncbi.nlm.nih.gov/compound/68152	68152	C3H6O3	90.08	C(CO)C(=O)O
92	3-Hydroxypyridine	https://pubchem.ncbi.nlm.nih.gov/compound/7971	7971	C5H5NO	95.1	C1=CC(=CN=C1)O
93	3-Methyl-2-Butenyl (E)-Isoferulate	-	-	C15H18O4	262.31	OC(C([H])=C(/C([H])=C([H])/C(OC([H])([H])/C([H])=C(C([H])([H])[H])/C([H])([H])[H])=O)C([H])=C1[H])=C1OC([H])([H])[H]
94	3-Methyl-2-butenyl (Z)-isoferulate	-	-	C15H18O4	262.31	OC(C([H])=C(/C([H])=C([H])\C(OC([H])([H])/C([H])=C(C([H])([H])[H])/C([H])([H])[H])=O)C([H])=C1[H])=C1OC([H])([H])[H]
95	3-Methyl-2-butenyl caffeate	https://pubchem.ncbi.nlm.nih.gov/compound/5281790	5281790	C14H16O4	248.27	CC(=CCOC(=O)C=CC1=CC(=C(C=C1)O)O)C
96	3-methyl-2-butenyl cis-4-coumarate	-	-	C14H16O3	232.28	OC1=CC=C(C=C1)/C=C\C(OC/C=C(C)\C)=O
97	3-Methyl-2-butenyl-cis-ferulate	-	-	C15H18O4	262.31	COC1=CC(/C=C\C(OC/C=C(C)\C)=O)=CC=C1O
98	3-methyl-2-butenyl-trans-caffeate	https://pubchem.ncbi.nlm.nih.gov/compound/5281790	5281790	C14H16O4	248.28	OC1=CC(/C=C/C(OC/C=C(C)\C)=O)=CC=C1O
99	3-Methyl-2-butenyl-trans-coumarate	https://pubchem.ncbi.nlm.nih.gov/compound/14794869	14794869	C14H16O3	232.28	OC1=CC=C(C=C1)/C=C/C(OC/C=C(C)\C)=O
100	3-Methyl-2-butenyl-trans-ferulate	https://pubchem.ncbi.nlm.nih.gov/compound/11369032	11369032	C15H18O4	262.3	COC1=CC(/C=C/C(OC/C=C(C)\C)=O)=CC=C1O
101	3-Methyl-3-butenyl (E)-isoferulate	-	-	C15H18O4	262.31	OC(C=C(/C=C/C(OCCC(C)=C)=O)C=C1)=C1OC
102	3-Methyl-3-butenyl (Z)-isoferulate	-	-	C15H18O4	262.31	OC(C=C(/C=C\C(OCCC(C)=C)=O)C=C1)=C1OC
103	3-Methyl-3-butenyl caffeate	https://pubchem.ncbi.nlm.nih.gov/compound/14237599	14237599	C14H16O4	248.27	CC(=C)CCOC(=O)C=CC1=CC(=C(C=C1)O)O
104	3-Methyl-3-butenyl cis-caffeate	https://pubchem.ncbi.nlm.nih.gov/compound/14237600	14237600	C14H16O4	248.27	CC(=C)CCOC(=O)/C=C\C1=CC(=C(C=C1)O)O
105	3-Methyl-3-butenyl trans caffeate	https://pubchem.ncbi.nlm.nih.gov/compound/14237599	14237599	C14H16O4	248.27	CC(=C)CCOC(=O)/C=C/C1=CC(=C(C=C1)O)O
106	3-Methyl-3-butenyl-cis-ferulate	-	-	C15H18O4	262.3	COC1=CC(/C=C\C(OCCC(C)=C)=O)=CC=C1O
107	3-Methyl-3-butenyl-trans-4-coumarate	https://pubchem.ncbi.nlm.nih.gov/compound/14794871	14794871	C14H16O3	232.27	OC1=CC=C(C=C1)/C=C/C(OCCC(C)=C)=O
108	3-Methyl-3-butenyl-trans-ferulate	https://pubchem.ncbi.nlm.nih.gov/compound/14237601	14237601	C15H18O4	262.3	CC(=C)CCOC(=O)C=CC1=CC(=C(C=C1)O)OC
109	3-Oxo-triterpenic acid methyl ester (oleanane type)	-	-	C31H50O3	470.74	C[C@@]1(C(OC)=O)C(CC[C@]2(C)[C@@]3([H])CC[C@]4([H])[C@]5([H])CC(C)(C)CC[C@@](C)5CC[C@](C)4[C@@](C)3CC[C@@]12[H])=O
110	3-Oxo-triterpenic acid methyl ester (ursane type)	-	-	C31H50O3	470.74	C[C@@]1(C(OC)=O)C(CC[C@]2(C)[C@@]3([H])CC[C@]4([H])[C@]5([H])[C@@H](C)[C@H](C)CC[C@@](C)5CC[C@](C)4[C@@](C)3CC[C@@]12[H])=O
111	3-Pentanyl-octyldihydroferulate	-	-	C23H38O4	378.55	COC1=CC(CCC(OCCC(CCCCC)CCCCC)=O)=CC=C1O
112	3-phenyl-2-propene-1-ol	https://pubchem.ncbi.nlm.nih.gov/compound/308	308	C9H10O	134.17	C1=CC=C(C=C1)C=CCO
113	3-Phenyl-3-hydroxypropanoic acid	https://pubchem.ncbi.nlm.nih.gov/compound/92959	92959	C9H10O3	166.17	C1=CC=C(C=C1)C(CC(=O)O)O
114	4- hydroxyBenzeneacetic acid hexanyl ester	-	-	C14H20O3	236.31	OC1=CC=C(C=C1)CC(OCCCCCC)=O
115	4(t-Butyl)2(prop-2'enyl)phenol	https://pubchem.ncbi.nlm.nih.gov/compound/4611298	4611298	C13H18O	190.28	OC1=CC=C(C=C1CC=C)C(C)(C)C
116	4,4-Dimethyl-3-oxacholest-5-en-7-one	https://pubchem.ncbi.nlm.nih.gov/compound/10093253	10093253	C28H46O2	414.7	CC(C)CCCC(C)C1CCC2C1(CCC3C2C(=O)C=C4C3(CCOC4(C)C)C)C
117	4-Amino-9-methoxypsoralen	https://pubchem.ncbi.nlm.nih.gov/compound/344253	344253	C12H9NO4	231.2	COC1=C2C(=C(C3=C1OC=C3)N)C=CC(=O)O2
118	4',6-Dimethoxyisoflavone-7-O-Beta-D-glucopyranoside	https://pubchem.ncbi.nlm.nih.gov/compound/10095770	10095770	C23H24O10	460.4	COC1=CC=C(C=C1)C2=COC3=CC(=C(C=C3C2=O)OC)OC4C(C(C(C(O4)CO)O)O)O
119	4'-Benzyloxy-5,7-dimethoxyflavone	https://pubchem.ncbi.nlm.nih.gov/compound/45933938	45933938	C24H20O5	388.4	COC1=CC2=C(C(=C1)OC)C(=O)C=C(O2)C3=CC=C(C=C3)OCC4=CC=CC=C4
120	4'-Hydroxyflavanone	https://pubchem.ncbi.nlm.nih.gov/compound/165506	165506	C15H12O3	240.25	C1C(OC2=CC=CC=C2C1=O)C3=CC=C(C=C3)O
121	4-Hydroxybenzoic acid	https://pubchem.ncbi.nlm.nih.gov/compound/135	135	C7H6O3	138.12	C1=CC(=CC=C1C(=O)O)O
122	4-Hydroxy-acetophenone	https://pubchem.ncbi.nlm.nih.gov/compound/7469	7469	C8H8O2	136.15	CC(=O)C1=CC=C(C=C1)O
123	4-Hydroxy-benzaldehyde	https://pubchem.ncbi.nlm.nih.gov/compound/126	126	C7H6O2	122.12	C1=CC(=CC=C1C=O)O
124	4-hydroxyBenzeneacetic acid	https://pubchem.ncbi.nlm.nih.gov/compound/127	127	C8H8O3	152.15	C1=CC(=CC=C1CC(=O)O)O
125	4-Methoxycinnamic acid	https://pubchem.ncbi.nlm.nih.gov/compound/13245	13245	C10H10O3	178.18	COC1=CC=C(C=C1)C=CC(=O)O
126	4-phenyl-4-hydroxybutanol	https://pubchem.ncbi.nlm.nih.gov/compound/263851	263851	C10H14O2	166.22	C1=CC=C(C=C1)C(CCCO)O
127	4-quinolinamine, N,3-diphenyl-2-(phenylmethyl)	https://pubchem.ncbi.nlm.nih.gov/compound/14591908	14591908	C28H22N2	386.5	C1(CC2=CC=CC=C2)=NC3=CC=CC=C3C(NC4=CC=CC=C4)=C1C5=CC=CC=C5
128	5,6,7,3',4',5'-Hexamethoxyflavone	https://pubchem.ncbi.nlm.nih.gov/compound/185670	185670	C21H22O8	402.4	COC1=CC(=CC(=C1OC)OC)C2=CC(=O)C3=C(C(=C(C=C3O2)OC)OC)OC
129	5,7,3',4',5'-Pentahydroxyflavone	https://pubchem.ncbi.nlm.nih.gov/compound/5281701	5281701	C15H10O7	302.23	C1=C(C=C(C(=C1O)O)O)C2=CC(=O)C3=C(C=C(C=C3O2)O)O
130	5,7,3',4'-Tetramethoxy-quercetin	https://pubchem.ncbi.nlm.nih.gov/compound/97142	97142	C19H18O7	358.3	COC1=C(C=C(C=C1)C2=C(C(=O)C3=C(O2)C=C(C=C3OC)OC)O)OC
131	5,7-Dihydroxy-3-butanoyloxyflavanone	https://pubchem.ncbi.nlm.nih.gov/compound/14440587	14440587	C19H18O6	342.3	CCCC(=O)OC1C(OC2=CC(=CC(=C2C1=O)O)O)C3=CC=CC=C3
132	5-azulenemethanol,1,2,3,4,5,6,7,8-octahydro-alpha,alpha,3,8-tetramethyl-	https://pubchem.ncbi.nlm.nih.gov/compound/227829	227829	C15H26O	222.37	CC1CCC(CC2=C1CCC2C)C(C)(C)O
133	5-Hydroxy-6(1-hydroxyethyl) 2,7-dimethoxy naphthoquinone	https://pubchem.ncbi.nlm.nih.gov/compound/158914	158914	C14H14O6	278.26	CC(C1=C(C=C2C(=C1O)C(=O)C=C(C2=O)OC)OC)O
134	5-Hydroxy-n-valeric acid	https://pubchem.ncbi.nlm.nih.gov/compound/25945	25945	C5H10O3	118.13	C(CCO)CC(=O)O
135	6(4-tert-Butylphenyl) 1,3,5-hexatriynyl	https://pubchem.ncbi.nlm.nih.gov/compound/134897593	134897593	C16H14	206.28	CC(C)(C)C1=CC=C(C=C1)C#CC#CC#C
136	6,7-Dimethoxy-3-isochromanone	https://pubchem.ncbi.nlm.nih.gov/compound/335610	335610	C11H12O4	208.21	COC1=C(C=C2COC(=O)CC2=C1)OC
137	6-Ethyl-3-formylchromone	https://pubchem.ncbi.nlm.nih.gov/compound/2758849	2758849	C12H10O3	202.21	CCC1=CC2=C(C=C1)OC=C(C2=O)C=O
138	7,3',4',5'-Tetramethoxyflavanone	https://pubchem.ncbi.nlm.nih.gov/compound/11842476	11842476	C19H20O6	344.4	COC1=CC2=C(C=C1)C(=O)CC(O2)C3=CC(=C(C(=C3)OC)OC)OC
139	7,8,3',4'-Tetrahydroxyflavone	https://pubchem.ncbi.nlm.nih.gov/compound/688798	688798	C15H10O6	286.24	C1=CC(=C(C=C1C2=CC(=O)C3=C(O2)C(=C(C=C3)O)O)O)O
140	7-Hydroxy-6-methoxyisoflavone	https://pubchem.ncbi.nlm.nih.gov/compound/21676187	21676187	C16H12O4	268.26	COC1=C(C=C2C(=C1)C(=O)C(=CO2)C3=CC=CC=C3)O
141	8,8aDimethyl2(1methylethylidene)1,2,3,7,8,8ahexahydronaphthalene	https://pubchem.ncbi.nlm.nih.gov/compound/608753	608753	C15H22	202.33	CC1CC=CC2=CCC(=C(C)C)CC12C
142	8,9-dihydrocyclohepta[a]phenalene-6(10h)-one	-	-	C18H14O	246.31	O=C(C=CC1=CC=C2)C3=C1C2=C4C(CCCC=C4)=C3
143	8-Methoxyhexadecanoic acid	-	-	C17H34O3	286.46	CCCCCCCCC(OC)CCCCCCC(O)=O
144	8-Methoxykaempferol	https://pubchem.ncbi.nlm.nih.gov/compound/5281698	5281698	C16H12O7	316.26	COC1=C(C=C(C2=C1OC(=C(C2=O)O)C3=CC=C(C=C3)O)O)O
145	8-Methyloctahydrocoumarin	https://pubchem.ncbi.nlm.nih.gov/compound/565323	565323	C10H16O2	168.23	CC1CCCC2C1OC(=O)CC2
146	9,19-Cyclolanostan-3-ol, 24-methylene-, acetate	https://pubchem.ncbi.nlm.nih.gov/compound/550623	550623	C33H54O2	482.8	CC(C)C(=C)CCC(C)C1CCC2(C1(CCC34C2CCC5C3(C4)CCC(C5(C)C)OC(=O)C)C)C
147	9-Hydroxybenzo[a]pyrene	https://pubchem.ncbi.nlm.nih.gov/compound/28598	28598	C20H12O	268.3	C1=CC2=C3C(=C1)C=CC4=C5C=C(C=CC5=CC(=C43)C=C2)O
148	9-octadecenoic acid (z)-, propyl ester	https://pubchem.ncbi.nlm.nih.gov/compound/5356106	5356106	C21H40O2	324.5	CCCCCCCCC=CCCCCCCCC(=O)OCCC
149	9-octadecenoic acid, (2-phenyl-1,3-dioxolan4--yl) methyl ester, cis	https://pubchem.ncbi.nlm.nih.gov/compound/21160048	21160048	C28H44O4	444.6	CCCCCCCCC=CCCCCCCCC(=O)OCC1COC(O1)C2=CC=CC=C2
150	Abietic acid	https://pubchem.ncbi.nlm.nih.gov/compound/10569	10569	C20H30O2	302.5	CC(C)C1=CC2=CCC3C(C2CC1)(CCCC3(C)C(=O)O)C
151	Acacetin	https://pubchem.ncbi.nlm.nih.gov/compound/5280442	5280442	C16H12O5	284.26	COC1=CC=C(C=C1)C2=CC(=O)C3=C(C=C(C=C3O2)O)O
152	Acetophenone-2'-hydroxy	https://pubchem.ncbi.nlm.nih.gov/compound/8375	8375	C8H8O2	136.15	CC(=O)C1=CC=CC=C1O
153	Acetophenone-3'-hydroxy	https://pubchem.ncbi.nlm.nih.gov/compound/8487	8487	C8H8O2	136.15	CC(=O)C1=CC(=CC=C1)O
154	alpha Linolenic acid	https://pubchem.ncbi.nlm.nih.gov/compound/5280934	5280934	C18H30O2	278.4	CCC=CCC=CCC=CCCCCCCCC(=O)O
155	alpha-Amyrin	https://pubchem.ncbi.nlm.nih.gov/compound/73170	73170	C30H50O	426.7	CC1CCC2(CCC3(C(=CCC4C3(CCC5C4(CCC(C5(C)C)O)C)C)C2C1C)C)C
156	Alpha-amyrin acetate	https://pubchem.ncbi.nlm.nih.gov/compound/92842	92842	C32H52O2	468.8	CC1CCC2(CCC3(C(=CCC4C3(CCC5C4(CCC(C5(C)C)OC(=O)C)C)C)C2C1C)C)C
157	alpha-Curcumene	https://pubchem.ncbi.nlm.nih.gov/compound/92139	92139	C15H22	202.33	CC1=CC=C(C=C1)C(C)CCC=C(C)C
158	alpha-D-Arabinopyranose	https://pubchem.ncbi.nlm.nih.gov/compound/7044039	7044039	C5H10O5	150.13	C1C(C(C(C(O1)O)O)O)O
159	alpha-D-Lactose	https://pubchem.ncbi.nlm.nih.gov/compound/84571	84571	C12H22O11	342.3	C(C1C(C(C(C(O1)OC2C(OC(C(C2O)O)O)CO)O)O)O)O
160	alpha-L-Arabinopyranose	https://pubchem.ncbi.nlm.nih.gov/compound/439731	439731	C5H10O5	150.13	C1C(C(C(C(O1)O)O)O)O
161	Apigenin	https://pubchem.ncbi.nlm.nih.gov/compound/5280443	5280443	C15H10O5	270.24	C1=CC(=CC=C1C2=CC(=O)C3=C(C=C(C=C3O2)O)O)O
162	Arabinonic acid	https://pubchem.ncbi.nlm.nih.gov/compound/122045	122045	C5H10O6	166.13	C(C(C(C(C(=O)O)O)O)O)O
163	Ar-Turmerone	https://pubchem.ncbi.nlm.nih.gov/compound/160512	160512	C15H20O	216.32	CC1=CC=C(C=C1)C(C)CC(=O)C=C(C)C
164	a-sitosterol	https://pubchem.ncbi.nlm.nih.gov/compound/9548595	9548595	C30H50O	426.7	CC=C(CCC(C)C1CCC2C1(CCC3C2=CCC4C3(CCC(C4C)O)C)C)C(C)C
165	Aucubin	https://pubchem.ncbi.nlm.nih.gov/compound/91458	91458	C15H22O9	346.33	C1=COC(C2C1C(C=C2CO)O)OC3C(C(C(C(O3)CO)O)O)O
166	Azelaic acid	https://pubchem.ncbi.nlm.nih.gov/compound/2266	2266	C9H16O4	188.22	C(CCCC(=O)O)CCCC(=O)O
167	Benzene-1,3-dihydroxy	https://pubchem.ncbi.nlm.nih.gov/compound/5054	5054	C6H6O2	110.11	C1=CC(=CC(=C1)O)O
168	Benzoic acid	https://pubchem.ncbi.nlm.nih.gov/compound/243	243	C7H6O2	122.12	C1=CC=C(C=C1)C(=O)O
169	Benzyl benzoate	https://pubchem.ncbi.nlm.nih.gov/compound/2345	2345	C14H12O2	212.24	C1=CC=C(C=C1)COC(=O)C2=CC=CC=C2
170	Benzyl caffeate	https://pubchem.ncbi.nlm.nih.gov/compound/5919576	5919576	C16H14O4	270.28	C1=CC=C(C=C1)COC(=O)C=CC2=CC(=C(C=C2)O)O
171	Benzyl-cis-caffeate	https://pubchem.ncbi.nlm.nih.gov/compound/6474382	6474382	C16H14O4	270.28	C1=CC=C(C=C1)COC(=O)/C=C\C2=CC(=C(C=C2)O)O
172	Benzyl-methyl ketone	https://pubchem.ncbi.nlm.nih.gov/compound/7678	7678	C9H10O	134.17	CC(=O)CC1=CC=CC=C1
173	Benzyl-trans-4-coumarate	https://pubchem.ncbi.nlm.nih.gov/compound/10083644	10083644	C16H14O3	254.28	C1=CC=C(C=C1)COC(=O)C=CC2=CC=C(C=C2)O
174	beta-Amyrin	https://pubchem.ncbi.nlm.nih.gov/compound/73145	73145	C30H50O	426.7	CC1(CCC2(CCC3(C(=CCC4C3(CCC5C4(CCC(C5(C)C)O)C)C)C2C1)C)C)C
175	Bicyclo[4.2.1]nona-2,4,7-triene,7-hydroxy	-	-	C9H10O	134.18	OC1=CC2C=CC=CC1C2
176	Biochanin A	https://pubchem.ncbi.nlm.nih.gov/compound/5280373	5280373	C16H12O5	284.26	COC1=CC=C(C=C1)C2=COC3=CC(=CC(=C3C2=O)O)O
177	Butanedioic acid	https://pubchem.ncbi.nlm.nih.gov/compound/1110	1110	C4H6O4	118.09	C(CC(=O)O)C(=O)O
178	Butyl caffeate	https://pubchem.ncbi.nlm.nih.gov/compound/9991705	9991705	C13H16O4	236.26	CCCCOC(=O)C=CC1=CC(=C(C=C1)O)O
179	Caffeic acid	https://pubchem.ncbi.nlm.nih.gov/compound/689043	689043	C9H8O4	180.16	C1=CC(=C(C=C1C=CC(=O)O)O)O
180	Caffeic acid methyl ester	https://pubchem.ncbi.nlm.nih.gov/compound/689075	689075	C10H10O4	194.18	COC(=O)C=CC1=CC(=C(C=C1)O)O
181	Caffeic acid phenethyl ester	https://pubchem.ncbi.nlm.nih.gov/compound/5281787	5281787	C17H16O4	284.31	C1=CC=C(C=C1)CCOC(=O)C=CC2=CC(=C(C=C2)O)O
182	Catechin	https://pubchem.ncbi.nlm.nih.gov/compound/9064	9064	C15H14O6	290.27	C1C(C(OC2=CC(=CC(=C21)O)O)C3=CC(=C(C=C3)O)O)O
183	Catechol	https://pubchem.ncbi.nlm.nih.gov/compound/289	289	C6H6O2	110.11	C1=CC=C(C(=C1)O)O
184	Chlorogenic acid	https://pubchem.ncbi.nlm.nih.gov/compound/1794427	1794427	C16H18O9	354.31	C1C(C(C(CC1(C(=O)O)O)OC(=O)C=CC2=CC(=C(C=C2)O)O)O)O
185	Chrysin	https://pubchem.ncbi.nlm.nih.gov/compound/5281607	5281607	C15H10O4	254.24	C1=CC=C(C=C1)C2=CC(=O)C3=C(C=C(C=C3O2)O)O
186	Cinnamic acid	https://pubchem.ncbi.nlm.nih.gov/compound/444539	444539	C9H8O2	148.16	C1=CC=C(C=C1)C=CC(=O)O
187	Cinnamyl alcohol	https://pubchem.ncbi.nlm.nih.gov/compound/5315892	5315892	C9H10O	134.17	C1=CC=C(C=C1)/C=C/CO
188	Cinnamyl caffeate	https://pubchem.ncbi.nlm.nih.gov/compound/11380911	11380911	C18H16O4	296.3	C1=CC=C(C=C1)C=CCOC(=O)C=CC2=CC(=C(C=C2)O)O
189	Cinnamyl-trans-4-coumarate	https://pubchem.ncbi.nlm.nih.gov/compound/92017879	92017879	C18H16O3	280.3	OC1=CC=C(C=C1)/C=C/C(OCC=CC2=CC=CC=C2)=O
190	cis-10-Heptadecenoic acid	https://pubchem.ncbi.nlm.nih.gov/compound/5312435	5312435	C17H32O2	268.4	CCCCCCC=CCCCCCCCCC(=O)O
191	Cis-9-Hexadecenoic acid	https://pubchem.ncbi.nlm.nih.gov/compound/445638	445638	C16H30O2	254.41	CCCCCCC=CCCCCCCCC(=O)O
192	cis-Caffeic acid ethyl ester	https://pubchem.ncbi.nlm.nih.gov/compound/42552859	42552859	C11H12O4	208.21	CCOC(=O)/C=C\C1=CC(=C(C=C1)O)O
193	cis-Ferulic acid	https://pubchem.ncbi.nlm.nih.gov/compound/1548883	1548883	C10H10O4	194.18	COC1=C(C=CC(=C1)/C=C\C(=O)O)O
194	cis-Isoferulic acid	https://pubchem.ncbi.nlm.nih.gov/compound/1549043	1549043	C10H10O4	194.18	COC1=C(C=C(C=C1)C=CC(=O)O)O
195	cis-p-Coumaric acid	https://pubchem.ncbi.nlm.nih.gov/compound/1549106	1549106	C9H8O3	164.16	C1=CC(=CC=C1/C=C\C(=O)O)O
196	Coniferyl alcohol	https://pubchem.ncbi.nlm.nih.gov/compound/1549095	1549095	C10H12O3	180.2	COC1=C(C=CC(=C1)C=CCO)O
197	Coumarin	https://pubchem.ncbi.nlm.nih.gov/compound/323	323	C9H6O2	146.14	C1=CC=C2C(=C1)C=CC(=O)O2
198	Cycloartenol	https://pubchem.ncbi.nlm.nih.gov/compound/92110	92110	C30H50O	426.7	CC(CCC=C(C)C)C1CCC2(C1(CCC34C2CCC5C3(C4)CCC(C5(C)C)O)C)C
199	cyclopropaneoctanoic acid, 2-[(2-pentylcyclopropyl)methyl]-, methyl ester, trans,trans-	https://pubchem.ncbi.nlm.nih.gov/compound/91719634	91719634	C21H38O2	322.5	CCCCCC1CC1CC2CC2CCCCCCCC(=O)OC
200	D-(-)-Fructofuranose	https://pubchem.ncbi.nlm.nih.gov/compound/439163	439163	C6H12O6	180.16	C(C1C(C(C(O1)(CO)O)O)O)O
201	D-(+)-Cellobiose	https://pubchem.ncbi.nlm.nih.gov/compound/10712	10712	C12H22O11	342.3	C(C1C(C(C(C(O1)OC2C(OC(C(C2O)O)O)CO)O)O)O)O
202	Daidzein	https://pubchem.ncbi.nlm.nih.gov/compound/5281708	5281708	C15H10O4	254.24	C1=CC(=CC=C1C2=COC3=C(C2=O)C=CC(=C3)O)O
203	Daidzin	https://pubchem.ncbi.nlm.nih.gov/compound/107971	107971	C21H20O9	416.4	C1=CC(=CC=C1C2=COC3=C(C2=O)C=CC(=C3)OC4C(C(C(C(O4)CO)O)O)O)O
204	dasycarpidan-1-methanol, acetate ester	https://pubchem.ncbi.nlm.nih.gov/compound/550072	550072	C20H26N2O2	326.4	CCC1C2CCN(C1C3=C(C2COC(=O)C)NC4=CC=CC=C43)C
205	Decanoic acid	https://pubchem.ncbi.nlm.nih.gov/compound/2969	2969	C10H20O2	172.26	CCCCCCCCCC(=O)O
206	Decyl caffeate	https://pubchem.ncbi.nlm.nih.gov/compound/71391747	71391747	C19H28O4	320.4	CCCCCCCCCCOC(=O)C=CC1=CC(=C(C=C1)O)O
207	Dehydroabietic acid	https://pubchem.ncbi.nlm.nih.gov/compound/94391	94391	C20H28O2	300.4	CC(C)C1=CC2=C(C=C1)C3(CCCC(C3CC2)(C)C(=O)O)C
208	D-Fructose	https://pubchem.ncbi.nlm.nih.gov/compound/2723872	2723872	C6H12O6	180.16	C1C(C(C(C(O1)(CO)O)O)O)O
209	D-Galacturonic Acid	https://pubchem.ncbi.nlm.nih.gov/compound/439215	439215	C6H10O7	194.14	C1(C(C(OC(C1O)O)C(=O)O)O)O
210	Diethylene glycol	https://pubchem.ncbi.nlm.nih.gov/compound/8117	8117	C4H10O3	106.12	C(COCCO)O
211	Dihydrokaempferol	https://pubchem.ncbi.nlm.nih.gov/compound/122850	122850	C15H12O6	288.25	C1=CC(=CC=C1C2C(C(=O)C3=C(C=C(C=C3O2)O)O)O)O
212	Dihydroxyacetone dimer	https://pubchem.ncbi.nlm.nih.gov/compound/4180364	4180364	C6H12O6	180.16	C1C(OCC(O1)(CO)O)(CO)O
213	Di-isooctyl phthalate	https://pubchem.ncbi.nlm.nih.gov/compound/33934	33934	C24H38O4	390.6	CC(C)CCCCCOC(=O)C1=CC=CC=C1C(=O)OCCCCCC(C)C
214	Diphenyl ether	https://pubchem.ncbi.nlm.nih.gov/compound/7583	7583	C12H10O	170.21	C1=CC=C(C=C1)OC2=CC=CC=C2
215	Docosane	https://pubchem.ncbi.nlm.nih.gov/compound/12405	12405	C22H46	310.6	CCCCCCCCCCCCCCCCCCCCCC
216	Dodecanoic acid	https://pubchem.ncbi.nlm.nih.gov/compound/3893	3893	C12H24O2	200.32	CCCCCCCCCCCC(=O)O
217	Dodecanoic acid, 4-penten-1-yl ester	https://pubchem.ncbi.nlm.nih.gov/compound/549343	549343	C17H32O2	268.4	CCCCCCCCCCCC(=O)OCCCC=C
218	Dodecyl caffeate	https://pubchem.ncbi.nlm.nih.gov/compound/44587441	44587441	C21H32O4	348.5	CCCCCCCCCCCCOC(=O)C=CC1=CC(=C(C=C1)O)O
219	D-Ribose	https://pubchem.ncbi.nlm.nih.gov/compound/10975657	10975657	C5H10O5	150.13	C1C(C(C(C(O1)O)O)O)O
220	Eicosanoic acid	https://pubchem.ncbi.nlm.nih.gov/compound/10467	10467	C20H40O2	312.5	CCCCCCCCCCCCCCCCCCCC(=O)O
221	Ellagic acid	https://pubchem.ncbi.nlm.nih.gov/compound/5281855	5281855	C14H6O8	302.19	C1=C2C3=C(C(=C1O)O)OC(=O)C4=CC(=C(C(=C43)OC2=O)O)O
222	Eriodictyol	https://pubchem.ncbi.nlm.nih.gov/compound/440735	440735	C15H12O6	288.25	C1C(OC2=CC(=CC(=C2C1=O)O)O)C3=CC(=C(C=C3)O)O
223	Esculetin	https://pubchem.ncbi.nlm.nih.gov/compound/5281416	5281416	C9H6O4	178.14	C1=CC(=O)OC2=CC(=C(C=C21)O)O
224	Ethanedioic acid	https://pubchem.ncbi.nlm.nih.gov/compound/971	971	C2H2O4	90.03	C(=O)(C(=O)O)O
225	Ethyl 7-hydroxycoumarin-4-carboxylate	https://pubchem.ncbi.nlm.nih.gov/compound/5702825	5702825	C12H10O5	234.2	CCOC(=O)C1=CC(=O)OC2=C1C=CC(=C2)O
226	Ethyl oleate	https://pubchem.ncbi.nlm.nih.gov/compound/5363269	5363269	C20H38O2	310.5	CCCCCCCCC=CCCCCCCCC(=O)OCC
227	Ethyl palmitate	https://pubchem.ncbi.nlm.nih.gov/compound/12366	12366	C18H36O2	284.5	CCCCCCCCCCCCCCCC(=O)OCC
228	Ethyl stearate	https://pubchem.ncbi.nlm.nih.gov/compound/8122	8122	C20H40O2	312.5	CCCCCCCCCCCCCCCCCC(=O)OCC
229	Ethyl tetracosanoate	https://pubchem.ncbi.nlm.nih.gov/compound/141135	141135	C26H52O2	396.7	CCCCCCCCCCCCCCCCCCCCCCCC(=O)OCC
230	Eugenol	https://pubchem.ncbi.nlm.nih.gov/compound/3314	3314	C10H12O2	164.2	COC1=C(C=CC(=C1)CC=C)O
231	Formononetin	https://pubchem.ncbi.nlm.nih.gov/compound/5280378	5280378	C16H12O4	268.26	COC1=CC=C(C=C1)C2=COC3=C(C2=O)C=CC(=C3)O
232	Fraxidin	https://pubchem.ncbi.nlm.nih.gov/compound/3083616	3083616	C11H10O5	222.19	COC1=C(C(=C2C(=C1)C=CC(=O)O2)O)OC
233	Galactitol	https://pubchem.ncbi.nlm.nih.gov/compound/11850	11850	C6H14O6	182.17	C(C(C(C(C(CO)O)O)O)O)O
234	Galangin	https://pubchem.ncbi.nlm.nih.gov/compound/5281616	5281616	C15H10O5	270.24	C1=CC=C(C=C1)C2=C(C(=O)C3=C(C=C(C=C3O2)O)O)O
235	Galangin-5-methylether	https://pubchem.ncbi.nlm.nih.gov/compound/5488105	5488105	C16H12O5	284.26	COC1=CC(=CC2=C1C(=O)C(=C(O2)C3=CC=CC=C3)O)O			check that it is galangin-5-methylether
236	Gamma-Dodecalactone	https://pubchem.ncbi.nlm.nih.gov/compound/16821	16821	C12H22O2	198.3	CCCCCCCCC1CCC(=O)O1
237	Gardenin	https://pubchem.ncbi.nlm.nih.gov/compound/261859	261859	C21H22O9	418.4	COC1=CC(=CC(=C1OC)OC)C2=CC(=O)C3=C(C(=C(C(=C3O2)OC)OC)OC)O
238	Genistein	https://pubchem.ncbi.nlm.nih.gov/compound/5280961	5280961	C15H10O5	270.24	C1=CC(=CC=C1C2=COC3=CC(=CC(=C3C2=O)O)O)O
239	Glucitol	https://pubchem.ncbi.nlm.nih.gov/compound/5780	5780	C6H14O6	182.17	C(C(C(C(C(CO)O)O)O)O)O
240	Gluconic acid	https://pubchem.ncbi.nlm.nih.gov/compound/10690	10690	C6H12O7	196.16	C(C(C(C(C(C(=O)O)O)O)O)O)O
241	Glucose	https://pubchem.ncbi.nlm.nih.gov/compound/5793	5793	C6H12O6	180.16	C(C1C(C(C(C(O1)O)O)O)O)O
242	Glycerol	https://pubchem.ncbi.nlm.nih.gov/compound/753	753	C3H8O3	92.09	C(C(CO)O)O
243	Glycerol monostearate	https://pubchem.ncbi.nlm.nih.gov/compound/24699	24699	C21H42O4	358.6	CCCCCCCCCCCCCCCCCC(=O)OCC(CO)O
244	Glyceryl palmitate	https://pubchem.ncbi.nlm.nih.gov/compound/14900	14900	C19H38O4	330.5	CCCCCCCCCCCCCCCC(=O)OCC(CO)O
245	Heptadecanoic acid	https://pubchem.ncbi.nlm.nih.gov/compound/10465	10465	C17H34O2	270.5	CCCCCCCCCCCCCCCCC(=O)O
246	Hesperetin	https://pubchem.ncbi.nlm.nih.gov/compound/72281	72281	C16H14O6	302.28	COC1=C(C=C(C=C1)C2CC(=O)C3=C(C=C(C=C3O2)O)O)O
247	Hexacosanoic acid	https://pubchem.ncbi.nlm.nih.gov/compound/10469	10469	C26H52O2	396.7	CCCCCCCCCCCCCCCCCCCCCCCCCC(=O)O
248	Hexadecanoic acid methyl ester	https://pubchem.ncbi.nlm.nih.gov/compound/8181	8181	C17H34O2	270.5	CCCCCCCCCCCCCCCC(=O)OC
249	Hexadecanoic acid, 2,3-dihydroxy-	https://pubchem.ncbi.nlm.nih.gov/compound/19591836	19591836	C16H32O4	288.42	CCCCCCCCCCCCCC(C(C(=O)O)O)O
250	Hexadecanoic acid, 2,3-dihydroxy propyl ester	https://pubchem.ncbi.nlm.nih.gov/compound/15521353	15521353	C19H38O4	330.5	CCCCCCCCCCCCCC(C(C(=O)OCCC)O)O
251	Hexadecanyl-trans-4-coumarate	https://pubchem.ncbi.nlm.nih.gov/compound/20815819	20815819	C25H40O3	388.6	OC1=CC=C(C=C1)/C=C/C(OCCCCCCCCCCCCCCCC)=O
252	Hexadecyl caffeate	https://pubchem.ncbi.nlm.nih.gov/compound/21580275	21580275	C25H40O4	404.6	CCCCCCCCCCCCCCCCOC(=O)C=CC1=CC(=C(C=C1)O)O
253	Hexadecyl-4-methoxyhydrocinnamate	https://pubchem.ncbi.nlm.nih.gov/compound/141080451	141080451	C26H44O3	404.6	O=C(OCCCCCCCCCCCCCCCC)CCC1=CC=C(OC)C=C1
254	Hexamethoxy flavone	https://pubchem.ncbi.nlm.nih.gov/compound/72344	72344	C21H22O8	402.4	COC1=C(C=C(C=C1)C2=CC(=O)C3=C(O2)C(=C(C(=C3OC)OC)OC)OC)OC
255	Hexopyranose	https://pubchem.ncbi.nlm.nih.gov/compound/206	206	C6H12O6	180.16	C(C1C(C(C(C(O1)O)O)O)O)O
256	Hydrocaffeic acid	https://pubchem.ncbi.nlm.nih.gov/compound/348154	348154	C9H10O4	182.17	C1=CC(=C(C=C1CCC(=O)O)O)O
257	Hydrocinnamic acid	https://pubchem.ncbi.nlm.nih.gov/compound/107	107	C9H10O2	150.17	C1=CC=C(C=C1)CCC(=O)O
258	Hydrocoumaric acid	https://pubchem.ncbi.nlm.nih.gov/compound/873	873	C9H10O3	166.17	C1=CC=C(C(=C1)CCC(=O)O)O
259	hydroferulic acid hendecenyl ester	-	-	C21H32O4	348.48	COC1=CC(CCC(OC=CCCCCCCCCC)=O)=CC=C1O
260	Hydroxyacetic acid	https://pubchem.ncbi.nlm.nih.gov/compound/757	757	C2H4O3	76.05	C(C(=O)O)O
261	Inositol	https://pubchem.ncbi.nlm.nih.gov/compound/892	892	C6H12O6	180.16	C1(C(C(C(C(C1O)O)O)O)O)O
262	Isalpinin	https://pubchem.ncbi.nlm.nih.gov/compound/5318691	5318691	C16H12O5	284.26	COC1=CC(=C2C(=C1)OC(=C(C2=O)O)C3=CC=CC=C3)O
263	Isonymphaeol C	-	-	C26H30O6	438.52	O=C1C([H])([H])[C@](C(C([H])=C2O[H])=C([H])C(C([H])([H])/C([H])=C(C([H])([H])[H])/C([H])([H])C([H])([H])/C([H])=C(C([H])([H])[H])/C([H])([H])[H])=C2O[H])([H])OC3=C([H])C(OC)=C([H])C(O[H])=C13
264	isonymphaeol-B	https://pubchem.ncbi.nlm.nih.gov/compound/10070991	10070991	C25H28O6	424.5	CC(=CCCC(=CCC1=C(C(=CC(=C1)C2CC(=O)C3=C(C=C(C=C3O2)O)O)O)O)C)C
265	isonymphaeol-D	-	-	C26H30O6	438.52	O=C1CC(C2=CC(C/C=C(CC/C=C(C)\C)\C)=C(O)C(O)=C2)OC3=C1C(OC)=CC(O)=C3
266	Isopentenyl-caffeate	https://pubchem.ncbi.nlm.nih.gov/compound/67411221	67411221	C14H16O4	248.27	OC1=CC(C=CC(OCCC(C)=C)=O)=CC=C1O
267	Itaconic acid	https://pubchem.ncbi.nlm.nih.gov/compound/811	811	C5H6O4	130.1	C=C(CC(=O)O)C(=O)O
268	Kaempferol	https://pubchem.ncbi.nlm.nih.gov/compound/5280863	5280863	C15H10O6	286.24	C1=CC(=CC=C1C2=C(C(=O)C3=C(C=C(C=C3O2)O)O)O)O
269	Kaempferol-3-methylether	https://pubchem.ncbi.nlm.nih.gov/compound/5280862	5280862	C16H12O6	300.26	COC1=C(OC2=CC(=CC(=C2C1=O)O)O)C3=CC=C(C=C3)O
270	L-Alanine	https://pubchem.ncbi.nlm.nih.gov/compound/5950	5950	C3H7NO2	89.09	CC(C(=O)O)N
271	Lanosterol	https://pubchem.ncbi.nlm.nih.gov/compound/246983	246983	C30H50O	426.7	CC(CCC=C(C)C)C1CCC2(C1(CCC3=C2CCC4C3(CCC(C4(C)C)O)C)C)C
272	Lanosterol acetate	https://pubchem.ncbi.nlm.nih.gov/compound/6710750	6710750	C32H52O2	468.8	CC(CCC=C(C)C)C1CCC2(C1(CCC3=C2CCC4C3(CCC(C4(C)C)OC(=O)C)C)C)C
273	Linoleic acid	https://pubchem.ncbi.nlm.nih.gov/compound/5280450	5280450	C18H32O2	280.4	CCCCCC=CCC=CCCCCCCCC(=O)O
274	Liquiritigenin	https://pubchem.ncbi.nlm.nih.gov/compound/114829	114829	C15H12O4	256.25	C1C(OC2=C(C1=O)C=CC(=C2)O)C3=CC=C(C=C3)O
275	Lupeol	https://pubchem.ncbi.nlm.nih.gov/compound/259846	259846	C30H50O	426.7	CC(=C)C1CCC2(C1C3CCC4C5(CCC(C(C5CCC4(C3(CC2)C)C)(C)C)O)C)C
276	Luteolin	https://pubchem.ncbi.nlm.nih.gov/compound/5280445	5280445	C15H10O6	286.24	C1=CC(=C(C=C1C2=CC(=O)C3=C(C=C(C=C3O2)O)O)O)O
277	Luteolin 3'-methyl ether	https://pubchem.ncbi.nlm.nih.gov/compound/5280666	5280666	C16H12O6	300.26	COC1=C(C=CC(=C1)C2=CC(=O)C3=C(C=C(C=C3O2)O)O)O
278	2,3,4,5-Tetrahydroxypentanoic Acid-1,4-Lactone	https://pubchem.ncbi.nlm.nih.gov/compound/219575	219575	C5H8O5	148.11	O=C(O1)C(O)C(O)C1CO
279	Malic acid	https://pubchem.ncbi.nlm.nih.gov/compound/525	525	C4H6O5	134.09	C(C(C(=O)O)O)C(=O)O
280	Maltose	https://pubchem.ncbi.nlm.nih.gov/compound/6255	6255	C12H22O11	342.3	C(C1C(C(C(C(O1)OC2C(OC(C(C2O)O)O)CO)O)O)O)O
281	Mannitol	https://pubchem.ncbi.nlm.nih.gov/compound/6251	6251	C6H14O6	182.17	C(C(C(C(C(CO)O)O)O)O)O
282	Menthol	https://pubchem.ncbi.nlm.nih.gov/compound/1254	1254	C10H20O	156.26	CC1CCC(C(C1)O)C(C)C
283	Methyl 15-hydroxyhexadecanoate	https://pubchem.ncbi.nlm.nih.gov/compound/617935	617935	C17H34O3	286.4	CC(CCCCCCCCCCCCCC(=O)OC)O
284	Methyl 3,4-dihydroxybenzoate	https://pubchem.ncbi.nlm.nih.gov/compound/287064	287064	C8H8O4	168.15	COC(=O)C1=CC(=C(C=C1)O)O
285	Methyl alpha-D-rhamnopyranoside	https://pubchem.ncbi.nlm.nih.gov/compound/10965080	10965080	C7H14O5	178.18	CC1C(C(C(C(O1)OC)O)O)O
286	Methyl glycocholate	https://pubchem.ncbi.nlm.nih.gov/compound/91578665	91578665	C27H45NO6	479.6	O[C@@H]1CC[C@]2(C)[C@@]3([H])C[C@H](O)[C@]4(C)[C@@H]([C@H](C)CCC(NCC(OC)=O)=O)CC[C@@]4([H])[C@]3([H])[C@H](O)CC2C1
287	Methyl stearate	https://pubchem.ncbi.nlm.nih.gov/compound/8201	8201	C19H38O2	298.5	CCCCCCCCCCCCCCCCCC(=O)OC
288	Methylglucose	https://pubchem.ncbi.nlm.nih.gov/compound/8973	8973	C7H14O6	194.18	COC(C(C=O)O)C(C(CO)O)O
289	Methylmalonic acid	https://pubchem.ncbi.nlm.nih.gov/compound/487	487	C4H6O4	118.09	CC(C(=O)O)C(=O)O
290	m-Methoxy cinnamic acid	https://pubchem.ncbi.nlm.nih.gov/compound/637668	637668	C10H10O3	178.18	COC1=CC=CC(=C1)C=CC(=O)O
291	Monoethyl succinate	https://pubchem.ncbi.nlm.nih.gov/compound/70610	70610	C6H10O4	146.14	CCOC(=O)CCC(=O)O
292	Myricetin	https://pubchem.ncbi.nlm.nih.gov/compound/5281672	5281672	C15H10O8	318.23	C1=C(C=C(C(=C1O)O)O)C2=C(C(=O)C3=C(C=C(C=C3O2)O)O)O
293	Myristicin	https://pubchem.ncbi.nlm.nih.gov/compound/4276	4276	C11H12O3	192.21	COC1=CC(=CC2=C1OCO2)CC=C
294	Naringenin	https://pubchem.ncbi.nlm.nih.gov/compound/439246	439246	C15H12O5	272.25	C1C(OC2=CC(=CC(=C2C1=O)O)O)C3=CC=C(C=C3)O
295	Nonanoic acid	https://pubchem.ncbi.nlm.nih.gov/compound/8158	8158	C9H18O2	158.24	CCCCCCCCC(=O)O
296	n-Pentadecanoic acid	https://pubchem.ncbi.nlm.nih.gov/compound/13849	13849	C15H30O2	242.4	CCCCCCCCCCCCCCC(=O)O
297	nymphaeol-B	https://pubchem.ncbi.nlm.nih.gov/compound/10387631	10387631	C25H28O6	424.5	CC(=CCCC(=CCC1=C(C=CC(=C1O)O)C2CC(=O)C3=C(C=C(C=C3O2)O)O)C)C
298	Octadecadienoic acid	https://pubchem.ncbi.nlm.nih.gov/compound/5312457	5312457	C18H32O2	280.4	CCCCCCCCCCCCCC=CC=CC(=O)O
299	Octadecanoic acid, 2,3-dihydroxy-propyl ester	https://pubchem.ncbi.nlm.nih.gov/compound/107036	107036	C20H40O4	344.5	CCCCCCCCCCCCCCCCC(=O)OCC(CO)O
300	Octadecenoic acid	https://pubchem.ncbi.nlm.nih.gov/compound/5282750	5282750	C18H34O2	282.5	CCCCCCCCCCCCCCCC=CC(=O)O
301	Octadecenoic acid methyl ester	https://pubchem.ncbi.nlm.nih.gov/compound/5364509	5364509	C19H36O2	296.5	CCCCCCCCC=CCCCCCCCC(=O)OC
302	Octadecenoic acid pentyl ester	https://pubchem.ncbi.nlm.nih.gov/compound/5354230	5354230	C23H44O2	352.6	CCCCCCCCC=CCCCCCCCC(=O)OCCCCC
303	Octadecyl-4-methoxyhydrocinnamate	-	-	C28H48O3	432.69	O=C(OCCCCCCCCCCCCCCCCCC)CCC1=CC=C(OC)C=C1
304	Octanedioic acid	https://pubchem.ncbi.nlm.nih.gov/compound/10457	10457	C8H14O4	174.19	C(CCCC(=O)O)CCC(=O)O
305	Octanoic acid	https://pubchem.ncbi.nlm.nih.gov/compound/379	379	C8H16O2	144.21	CCCCCCCC(=O)O
306	Oleanitrile	https://pubchem.ncbi.nlm.nih.gov/compound/6420241	6420241	C18H33N	263.5	CCCCCCCCC=CCCCCCCCC#N
307	Oleic acid	https://pubchem.ncbi.nlm.nih.gov/compound/445639	445639	C18H34O2	282.5	CCCCCCCCC=CCCCCCCCC(=O)O
308	Palmitic acid	https://pubchem.ncbi.nlm.nih.gov/compound/985	985	C16H32O2	256.42	CCCCCCCCCCCCCCCC(=O)O
309	Pentacosane	https://pubchem.ncbi.nlm.nih.gov/compound/12406	12406	C25H52	352.7	CCCCCCCCCCCCCCCCCCCCCCCCC
310	Pentadecanoic acid, 14-methyl-, methyl ester	https://pubchem.ncbi.nlm.nih.gov/compound/21205	21205	C17H34O2	270.5	CC(C)CCCCCCCCCCCCC(=O)OC
311	Pentadecyl hydroferulate	-	-	C25H42O4	406.61	COC1=CC(CCC(OCCCCCCCCCCCCCCC)=O)=CC=C1O
312	Pentonic acid-2-deoxy-3,5-dihydroxy-gamma-lactone	https://pubchem.ncbi.nlm.nih.gov/compound/4635870	4635870	C5H8O4	132.11	[H]C(C(C1CO)O)C(O1)=O
313	Pentyl caffeate	https://pubchem.ncbi.nlm.nih.gov/compound/15086370	15086370	C14H18O4	250.29	CCCCCOC(=O)C=CC1=CC(=C(C=C1)O)O
314	Phenol	https://pubchem.ncbi.nlm.nih.gov/compound/996	996	C6H6O	94.11	C1=CC=C(C=C1)O
315	Phenol, 4-propoxy-	https://pubchem.ncbi.nlm.nih.gov/compound/29352	29352	C9H12O2	152.19	CCCOC1=CC=C(C=C1)O
316	Phenolphthalein	https://pubchem.ncbi.nlm.nih.gov/compound/4764	4764	C20H14O4	318.3	C1=CC=C2C(=C1)C(=O)OC2(C3=CC=C(C=C3)O)C4=CC=C(C=C4)O
317	Phenylethyl-trans-caffeate	https://pubchem.ncbi.nlm.nih.gov/compound/5281787	5281787	C17H16O4	284.31	C1=CC=C(C=C1)CCOC(=O)/C=C/C2=CC(=C(C=C2)O)O
318	Phosphoric acid	https://pubchem.ncbi.nlm.nih.gov/compound/1004	1004	H3O4P	97.995	OP(=O)(O)O
319	Phthalic acid, butyl dodecyl ester	https://pubchem.ncbi.nlm.nih.gov/compound/96361	96361	C24H38O4	390.6	CCCCCCCCCCCCOC(=O)C1=CC=CC=C1C(=O)OCCCC
320	Phthalic acid, butyl octyl ester	https://pubchem.ncbi.nlm.nih.gov/compound/66540	66540	C20H30O4	334.4	CCCCCCCCOC(=O)C1=CC=CC=C1C(=O)OCCCC
321	Pimaric acid	https://pubchem.ncbi.nlm.nih.gov/compound/220338	220338	C20H30O2	302.5	CC1(CCC2C(=C1)CCC3C2(CCCC3(C)C(=O)O)C)C=C
322	Pinobanksin	https://pubchem.ncbi.nlm.nih.gov/compound/73202	73202	C15H12O5	272.25	C1=CC=C(C=C1)C2C(C(=O)C3=C(C=C(C=C3O2)O)O)O
323	Pinobanksin-3-acetate	https://pubchem.ncbi.nlm.nih.gov/compound/148556	148556	C17H14O6	314.29	CC(=O)OC1C(OC2=CC(=CC(=C2C1=O)O)O)C3=CC=CC=C3
324	Pinocembrin	https://pubchem.ncbi.nlm.nih.gov/compound/68071	68071	C15H12O4	256.25	C1C(OC2=CC(=CC(=C2C1=O)O)O)C3=CC=CC=C3
325	Pinocembrin chalcone	https://pubchem.ncbi.nlm.nih.gov/compound/6474295	6474295	C15H12O4	256.25	C1=CC=C(C=C1)C=CC(=O)C2=C(C=C(C=C2O)O)O
326	Pinocembrin-8-prenyl	https://pubchem.ncbi.nlm.nih.gov/compound/124049	124049	C20H20O4	324.4	CC(=CCC1=C2C(=C(C=C1O)O)C(=O)CC(O2)C3=CC=CC=C3)C
327	Pinostrobin	https://pubchem.ncbi.nlm.nih.gov/compound/73201	73201	C16H14O4	270.28	COC1=CC(=C2C(=O)CC(OC2=C1)C3=CC=CC=C3)O
328	Pinostrobin chalcone	https://pubchem.ncbi.nlm.nih.gov/compound/5316793	5316793	C16H14O4	270.28	COC1=CC(=C(C(=C1)O)C(=O)C=CC2=CC=CC=C2)O
329	p-Menth-1-en-3-one	https://pubchem.ncbi.nlm.nih.gov/compound/6987	6987	C10H16O	152.23	CC1=CC(=O)C(CC1)C(C)C
330	P-Methoxy-cis-cinnamic acid	https://pubchem.ncbi.nlm.nih.gov/compound/1550936	1550936	C10H10O3	178.18	COC1=CC=C(C=C1)/C=C\C(=O)O
331	Pratol	https://pubchem.ncbi.nlm.nih.gov/compound/5320693	5320693	C16H12O4	268.26	COC1=CC=C(C=C1)C2=CC(=O)C3=C(O2)C=C(C=C3)O
332	Prenyl- hydrocaffeic acid ester	-	-	C14H18O4	250.29	OC1=CC(CCC(OC/C=C(C)\C)=O)=CC=C1O
333	Prenylferulate	https://pubchem.ncbi.nlm.nih.gov/compound/11369032	11369032	C15H18O4	262.3	CC(=CCOC(=O)C=CC1=CC(=C(C=C1)O)OC)C
334	Prenyl-isoferulate	-	-	C15H18O4	262.31	O=C(/C([H])=C([H])/C(C([H])=C1[H])=C([H])C(O[H])=C1OC([H])([H])[H])OC/C=C(C)\C
335	Protocatechuic acid	https://pubchem.ncbi.nlm.nih.gov/compound/72	72	C7H6O4	154.12	C1=CC(=C(C=C1C(=O)O)O)O
336	Prunetin	https://pubchem.ncbi.nlm.nih.gov/compound/5281804	5281804	C16H12O5	284.26	COC1=CC(=C2C(=C1)OC=C(C2=O)C3=CC=C(C=C3)O)O
337	Pyrogallol	https://pubchem.ncbi.nlm.nih.gov/compound/1057	1057	C6H6O3	126.11	C1=CC(=C(C(=C1)O)O)O
338	Pyruvic Acid	https://pubchem.ncbi.nlm.nih.gov/compound/1060	1060	C3H4O3	88.06	CC(=O)C(=O)O
339	Quercetin	https://pubchem.ncbi.nlm.nih.gov/compound/5280343	5280343	C15H10O7	302.23	C1=CC(=C(C=C1C2=C(C(=O)C3=C(C=C(C=C3O2)O)O)O)O)O
340	Quercetin-3,3'-dimethylether	https://pubchem.ncbi.nlm.nih.gov/compound/5316900	5316900	C17H14O7	330.29	COC1=C(C=CC(=C1)C2=C(C(=O)C3=C(C=C(C=C3O2)O)O)OC)O
341	Quercetin-3,7,3',4'-tetramethyl ether	https://pubchem.ncbi.nlm.nih.gov/compound/5352005	5352005	C19H18O7	358.3	COC1=C(C=C(C=C1)C2=C(C(=O)C3=C(C=C(C=C3O2)OC)O)OC)OC
342	Quercetin-3,7-dimethylether	https://pubchem.ncbi.nlm.nih.gov/compound/5280417	5280417	C17H14O7	330.29	COC1=CC(=C2C(=C1)OC(=C(C2=O)OC)C3=CC(=C(C=C3)O)O)O
343	Quercetin-3-methylether	https://pubchem.ncbi.nlm.nih.gov/compound/5280681	5280681	C16H12O7	316.26	COC1=C(OC2=CC(=CC(=C2C1=O)O)O)C3=CC(=C(C=C3)O)O
344	Quercetin-7,3'-dimethylether	https://pubchem.ncbi.nlm.nih.gov/compound/5320945	5320945	C17H14O7	330.29	COC1=CC(=C2C(=C1)OC(=C(C2=O)O)C3=CC(=C(C=C3)O)OC)O
345	Quercetin-7-methylether	https://pubchem.ncbi.nlm.nih.gov/compound/5281691	5281691	C16H12O7	316.26	COC1=CC(=C2C(=C1)OC(=C(C2=O)O)C3=CC(=C(C=C3)O)O)O
346	Quinic acid	https://pubchem.ncbi.nlm.nih.gov/compound/6508	6508	C7H12O6	192.17	C1C(C(C(CC1(C(=O)O)O)O)O)O
347	Rhapontigenin	https://pubchem.ncbi.nlm.nih.gov/compound/5320954	5320954	C15H14O4	258.27	COC1=C(C=C(C=C1)C=CC2=CC(=CC(=C2)O)O)O
348	Ribonic acid	https://pubchem.ncbi.nlm.nih.gov/compound/5460677	5460677	C5H10O6	166.13	C(C(C(C(C(=O)O)O)O)O)O
349	Rosmarinic acid	https://pubchem.ncbi.nlm.nih.gov/compound/5281792	5281792	C18H16O8	360.3	C1=CC(=C(C=C1CC(C(=O)O)OC(=O)C=CC2=CC(=C(C=C2)O)O)O)O
350	Salicylic acid	https://pubchem.ncbi.nlm.nih.gov/compound/338	338	C7H6O3	138.12	C1=CC=C(C(=C1)C(=O)O)O
351	Sesamin	https://pubchem.ncbi.nlm.nih.gov/compound/72307	72307	C20H18O6	354.4	C1C2C(COC2C3=CC4=C(C=C3)OCO4)C(O1)C5=CC6=C(C=C5)OCO6
352	Sorbose	https://pubchem.ncbi.nlm.nih.gov/compound/439192	439192	C6H12O6	180.16	C1C(C(C(C(O1)(CO)O)O)O)O
353	Stearic Acid	https://pubchem.ncbi.nlm.nih.gov/compound/5281	5281	C18H36O2	284.5	CCCCCCCCCCCCCCCCCC(=O)O
354	Sucrose	https://pubchem.ncbi.nlm.nih.gov/compound/5988	5988	C12H22O11	342.3	C(C1C(C(C(C(O1)OC2(C(C(C(O2)CO)O)O)CO)O)O)O)O
355	Talopyranose	https://pubchem.ncbi.nlm.nih.gov/compound/441035	441035	C6H12O6	180.16	C(C1C(C(C(C(O1)O)O)O)O)O
356	Tectochrysin	https://pubchem.ncbi.nlm.nih.gov/compound/5281954	5281954	C16H12O4	268.26	COC1=CC(=C2C(=C1)OC(=CC2=O)C3=CC=CC=C3)O
357	Tetracosane	https://pubchem.ncbi.nlm.nih.gov/compound/12592	12592	C24H50	338.7	CCCCCCCCCCCCCCCCCCCCCCCC
358	Tetracosanoic acid	https://pubchem.ncbi.nlm.nih.gov/compound/11197	11197	C24H48O2	368.6	CCCCCCCCCCCCCCCCCCCCCCCC(=O)O
359	Tetracosenoic acid	https://pubchem.ncbi.nlm.nih.gov/compound/6440260	6440260	C24H46O2	366.6	CCCCCCCCCCCCCCCCCCCCCC=CC(=O)O
360	Tetradecanoic acid	https://pubchem.ncbi.nlm.nih.gov/compound/11005	11005	C14H28O2	228.37	CCCCCCCCCCCCCC(=O)O
361	Tetradecanyl-trans-4-coumarate	https://pubchem.ncbi.nlm.nih.gov/compound/11588549	11588549	C23H36O3	360.5	OC1=CC=C(C=C1)/C=C/C(OCCCCCCCCCCCCCC)=O
362	Tetradecyl caffeate	https://pubchem.ncbi.nlm.nih.gov/compound/71359866	71359866	C23H36O4	376.5	OC1=CC(C=CC(OCCCCCCCCCCCCCC)=O)=CC=C1O
363	Tetradecyl-4-methoxyhydrocinnamate	-	-	C24H40O3	376.58	O=C(OCCCCCCCCCCCCCC)CCC1=CC=C(OC)C=C1
364	Tetraethylene glycol di(2-ethylhexanoate)	https://pubchem.ncbi.nlm.nih.gov/compound/28999	28999	C24H46O7	446.6	CCCCC(CC)C(=O)OCCOCCOCCOCCOC(=O)C(CC)CCCC
365	trans-3-Penteny-trans-4-coumarate	-	-	C14H16O3	232.28	OC1=CC=C(C=C1)/C=C/C(OCC/C=C/C)=O
366	trans-4-Methoxycinnamic acid	https://pubchem.ncbi.nlm.nih.gov/compound/699414	699414	C10H10O3	178.18	COC1=CC=C(C=C1)/C=C/C(=O)O
367	trans-Caffeic acid ethyl ester	https://pubchem.ncbi.nlm.nih.gov/compound/5317238	5317238	C11H12O4	208.21	CCOC(=O)/C=C/C1=CC(=C(C=C1)O)O
368	trans-Ferulic acid	https://pubchem.ncbi.nlm.nih.gov/compound/445858	445858	C10H10O4	194.18	COC1=C(C=CC(=C1)/C=C/C(=O)O)O
369	trans-Isoferulic acid	https://pubchem.ncbi.nlm.nih.gov/compound/736186	736186	C10H10O4	194.18	COC1=C(C=C(C=C1)/C=C/C(=O)O)O
370	trans-methyl 2-methyl-3-(2-hydroxyphen yl)-3,4-dihydro-1(2h)-isoquinoline-4-carboxylate	-	-	C18H19NO3	297.35	OC1=CC=CC=C1C2N(C)CC3=C(C2C(OC)=O)C=CC=C3
371	trans-p-Coumaric acid	https://pubchem.ncbi.nlm.nih.gov/compound/637542	637542	C9H8O3	164.16	C1=CC(=CC=C1/C=C/C(=O)O)O
372	Tricosane	https://pubchem.ncbi.nlm.nih.gov/compound/12534	12534	C23H48	324.6	CCCCCCCCCCCCCCCCCCCCCCC
373	Tridecyl hydroferulate	-	-	C23H38O4	378.55	COC1=CC(CCC(OCCCCCCCCCCCCC)=O)=CC=C1O
374	Tropine	https://pubchem.ncbi.nlm.nih.gov/compound/8424	8424	C8H15NO	141.21	CN1C2CCC1CC(C2)O
375	Undecanoic acid	https://pubchem.ncbi.nlm.nih.gov/compound/8180	8180	C11H22O2	186.29	CCCCCCCCCCC(=O)O
376	Vanillic acid	https://pubchem.ncbi.nlm.nih.gov/compound/8468	8468	C8H8O4	168.15	COC1=C(C=CC(=C1)C(=O)O)O
377	Vanillin	https://pubchem.ncbi.nlm.nih.gov/compound/1183	1183	C8H8O3	152.15	COC1=C(C=CC(=C1)C=O)O
378	Xylitol	https://pubchem.ncbi.nlm.nih.gov/compound/6912	6912	C5H12O5	152.15	C(C(C(C(CO)O)O)O)O
